# Supplementary material for: Characterizing the lone pair⋯π–hole interaction in complexes of ammonia with perfluorinated arenes
Source: Royal Society of Chemistry journal article supplement (doi:10.1039/d1cp00451d), 2021-01-01
Supplement: d1cp00451d1.pdf [file d1cp00451d1.pdf]

# Characterizing the lone pair··· $\pi$ -hole interaction in complexes of ammonia with perfluorinated arenes

*Weixing Li,<sup>[a], [b]</sup> † Imanol Usabiaga,<sup>[a], †</sup> Camilla Calabrese,<sup>[c], [d], [e]</sup> \* Luca*

*Evangelisti,<sup>[a]</sup> Assimo Maris,<sup>[a]</sup> Laura B. Favero<sup>[f]</sup> and Sonia Melandri<sup>[a]</sup> \*<sup>†</sup>*

<sup>[a]</sup> Department of Chemistry “Giacomo Ciamician”, University of Bologna, via Selmi, 2, 40126, Bologna (Italy).

<sup>[b]</sup> Present address of Dr. W. Li: Deutsches Elektronen-Synchrotron (DESY), Notkestr. 85, 22607 Hamburg, Germany

<sup>[c]</sup> Department of Physical Chemistry, University of the Basque Country (UPV/EHU), Barrio Sarriena, S/N, 48940, Leioa (Spain).

<sup>[d]</sup> Biofísica Institute, (CSIC, UPV/EHU), Barrio Sarriena, S/N, 48940, Leioa (Spain).

<sup>[e]</sup> Fundación Biofísica Bizkaia/Biofísica Bizkaia Fundazioa (FBB), Barrio Sarriena, S/N, 48940, Leioa (Spain).

<sup>[f]</sup> Istituto per lo studio dei materiali nanostrutturati CNR – ISMN Via Gobetti 101, 40129, Bologna (Italy).

<sup>[†]</sup> These authors contributed equally to this work.

## Corresponding Authors

\* Camilla Calabrese: calabrese.cami@gmail.com

\* Sonia Melandri: sonia.melandri@unibo.it

**ELECTRONIC SUPPLEMENTARY**  
**INFORMATION**

## Table of Contents

**Table S1:** Theoretical (B3LYP-D3(BJ)/def2-TZVP) equilibrium structure for  $C_6F_6 \cdot NH_3$ .

**Table S2:** Theoretical (B3LYP-D3(BJ)/def2-TZVP) equilibrium structure for the observed I complex of  $C_5F_5N \cdot NH_3$ .

**Table S3:** Theoretical (B3LYP-GD3(BJ)/def2-TZVP) spectroscopic parameters of the two plausible conformers of  $C_5F_5N \cdot NH_3$ .

**Table S4:** Experimental transition frequencies of  $C_6F_6 \cdot ^{14}NH_3$ . Assignments, measured transition frequencies ( $\nu$ /MHz), and observed-calculated residuals ( $\Delta \nu$ /MHz) from the fit for  $m = 0, 1, -1$ .

**Table S5:** Experimental transition frequencies of  $C_6F_6 \cdot ^{15}NH_3$ . Assignments, measured transition frequencies ( $\nu$ /MHz), and observed-calculated residuals ( $\Delta \nu$ /MHz) from the fit for  $m = 0, 1, -1$ .

**Table S6:** Experimental frequencies of  $C_5F_5N \cdot ^{14}NH_3$ . Assignments, measured transition frequencies ( $\nu$ /MHz), and observed-calculated residuals ( $\Delta \nu$ /MHz) from the fit.

**Table S7:** Experimental frequencies of  $C_5F_5N \cdot ^{15}NH_3$ . Assignments, measured transition frequencies ( $\nu$ /MHz), and observed-calculated residuals ( $\Delta \nu$ /MHz) from the fit.

**Table S8:** Experimental substitution ( $r_s$ ) and theoretical equilibrium ( $r_e$ , B3LYP-GD3(BJ)/def2-TZVP) coordinates in the principal axis coordinates of ammonia N atom ( $\text{\AA}$ ).

**Figure S1.** SAPT2+3(CCD)/aug-cc-pVDZ analysis for the complexes of water and ammonia formed with  $C_6F_6$  as a function of the distance of N or O from the center of the ring.

**Table S1:** Theoretical (B3LYP-D3(BJ)/def2-TZVP) equilibrium structure for  $C_6F_6 \cdot NH_3$ .

|   | <i>a</i> /Å | <i>b</i> /Å | <i>c</i> /Å |
|---|-------------|-------------|-------------|
| C | -1.20037    | 0.69304     | -0.28484    |
| C | 0.00000     | 1.38611     | -0.28524    |
| C | 1.20037     | 0.69304     | -0.28484    |
| C | 1.20041     | -0.69306    | -0.28524    |
| C | 0.00000     | -1.38607    | -0.28484    |
| C | -1.20041    | -0.69306    | -0.28524    |
| F | -2.35515    | 1.35975     | -0.26675    |
| F | 0.00000     | 2.71967     | -0.26696    |
| F | 2.35515     | 1.35975     | -0.26675    |
| F | 2.35530     | -1.35983    | -0.26696    |
| F | 0.00000     | -2.71950    | -0.26675    |
| F | -2.35530    | -1.35983    | -0.26696    |
| N | 0.00000     | 0.00000     | 2.924971    |
| H | -0.81534    | -0.47074    | 3.301832    |
| H | 0.00000     | 0.94147     | 3.301832    |
| H | 0.81534     | -0.47074    | 3.301832    |

**Table S2:** Theoretical (B3LYP-D3(BJ)/def2-TZVP) equilibrium structure for the observed I complex of  $C_5F_5N \cdot NH_3$ .

|   | <i>a</i> /Å | <i>b</i> /Å | <i>c</i> /Å |
|---|-------------|-------------|-------------|
| N | -1.49128    | -0.62763    | 0.00000     |
| C | -0.83698    | -0.50834    | 1.12589     |
| C | 0.52638     | -0.27317    | 1.19763     |
| C | 1.21651     | -0.15402    | 0.00000     |
| C | 0.52638     | -0.27317    | -1.19763    |
| C | -0.83698    | -0.50834    | -1.12589    |
| F | -1.53110    | -0.61451    | 2.25789     |
| F | 1.16223     | -0.14441    | 2.36185     |
| F | 2.51943     | 0.08961     | 0.00000     |
| F | 1.16223     | -0.14441    | -2.36185    |
| F | -1.53110    | -0.61451    | -2.25789    |
| N | -0.85437    | 2.65950     | 0.00000     |
| H | -0.66835    | 3.23164     | -0.81646    |
| H | -1.84809    | 2.45476     | 0.00000     |
| H | -0.66835    | 3.23164     | 0.81646     |
| N | -1.49128    | -0.62763    | 0.00000     |

**Table S3:** Theoretical (B3LYP-GD3(BJ)/def2-TZVP) spectroscopic parameters of the two plausible conformers of  $C_5F_5N \cdot NH_3$ .

|                                 | I                | II           |
|---------------------------------|------------------|--------------|
| $A$ /MHz                        | 1005.8           | 955.3        |
| $B$ /MHz                        | 807.4            | 782.9        |
| $C$ /MHz                        | 616.1            | 610.7        |
| $\chi_{aa}$ /MHz <sup>[c]</sup> | 2.022/2.225      | 2.026/2.312  |
| $\chi_{bb}$ /MHz <sup>[c]</sup> | -4.013/0.522     | -3.948/1.360 |
| $\chi_{cc}$ /MHz <sup>[c]</sup> | 1.991/-2.747     | 1.922/-3.672 |
| $\mu_a/\mu_b/\mu_c$ /D          | 0/0.2/2          | 0/1.5/1.2    |
| $\Delta E$ (kJ/mol)             | 0 <sup>[a]</sup> | 11.3         |
| $\Delta E_{+ZPE}$ (kJ/mol)      | 0 <sup>[b]</sup> | 10.6         |

<sup>[a]</sup> Absolute energy -801.3807718 Hartrees

<sup>[b]</sup> Absolute energy -801.296826 Hartrees

<sup>[c]</sup>The first value refers to  $C_5F_5N$  while the second one to  $NH_3$ .

**Table S4:** Experimental transition frequencies of  $C_6F_6-^{14}NH_3$ . Assignments, measured transition frequencies ( $\nu$ /MHz), and observed-calculated residuals ( $\Delta\nu$ /MHz) from the fit for  $m = 0, 1, -1$ .

|    |    |    |     |     | m = 0 |            | m = 1            |            | m = - 1          |            |                  |
|----|----|----|-----|-----|-------|------------|------------------|------------|------------------|------------|------------------|
| J' | K' | F' | J'' | K'' | F''   | $\nu$ /MHz | $\Delta\nu$ /MHz | $\nu$ /MHz | $\Delta\nu$ /MHz | $\nu$ /MHz | $\Delta\nu$ /MHz |
| 5  | 0  | 6  | 4   | 0   | 5     | 7596.2580  | -0.0042          | 7595.5898  | -0.0019          | 7595.5898  | -0.0019          |
| 5  | 1  | 6  | 4   | 1   | 5     | 7596.2343  | 0.0019           | 7595.4672  | -0.0005          | 7595.7140  | 0.0106           |
| 5  | 2  | 6  | 4   | 2   | 5     | 7596.2343  | -0.0104          | 7595.3301  | -0.0018          | 7595.7997  | -0.0036          |
| 5  | 0  | 5  | 4   | 0   | 4     | 7596.2580  | 0.0125           | 7595.5719  | -0.0031          | 7595.5719  | -0.0031          |
| 5  | 1  | 5  | 4   | 1   | 4     | 7596.1868  | 0.0003           | 7595.3938  | -0.0042          | 7595.6321  | -0.0017          |
| 5  | 2  | 5  | 4   | 2   | 4     | 7596.0106  | -0.0004          | 7595.1041  | 0.0004           | 7595.5719  | -0.0032          |
| 5  | 0  | 4  | 4   | 0   | 3     |            |                  | 7595.5345  | -0.0024          | 7595.5345  | -0.0024          |
| 6  | 0  | 7  | 5   | 0   | 6     | 9115.4828  | 0.0000           | 9114.6762  | -0.0018          | 9114.6762  | -0.0018          |
| 6  | 1  | 7  | 5   | 1   | 6     | 9115.4653  | -0.0026          | 9114.5184  | -0.0032          | 9114.8009  | -0.0037          |
| 6  | 2  | 7  | 5   | 2   | 6     | 9115.4233  | -0.0005          | 9114.3324  | -0.0037          | 9114.9057  | 0.0038           |
| 6  | 3  | 7  | 5   | 3   | 6     | 9115.3647  | 0.0124           |            |                  | 9114.9698  | -0.0020          |
| 6  | 4  | 7  | 5   | 4   | 6     | 9115.2524  | -0.0041          | 9113.8837  | -0.0020          | 9115.0237  | 0.0063           |
| 6  | 0  | 6  | 5   | 0   | 5     | 9115.4653  | -0.0050          | 9114.6608  | -0.0049          | 9114.6608  | -0.0049          |
| 6  | 1  | 6  | 5   | 1   | 5     | 9115.4233  | -0.0015          | 9114.4757  | -0.0029          | 9114.8009  | -0.0036          |
| 6  | 2  | 6  | 5   | 2   | 5     | 9115.2897  | 0.0013           | 9114.2012  | 0.0004           | 9114.9057  | 0.0039           |
| 6  | 3  | 6  | 5   | 3   | 5     | 9115.0679  | 0.0048           | 9113.8436  | 0.0096           | 9114.9698  | -0.0019          |
| 6  | 4  | 6  | 5   | 4   | 5     | 9114.7606  | 0.0039           | 9113.3857  | 0.0041           | 9115.0237  | 0.0063           |
| 6  | 0  | 5  | 5   | 0   | 4     | 9115.4458  | -0.0005          | 9114.6444  | 0.0026           | 9114.6444  | 0.0026           |
| 6  | 1  | 5  | 5   | 1   | 4     | 9115.4458  | 0.0054           | 9114.4931  | -0.0012          | 9114.7775  | 0.0002           |
| 6  | 2  | 5  | 5   | 2   | 4     | 9115.4233  | -0.0001          | 9114.3324  | -0.0031          | 9114.9057  | 0.0042           |
| 7  | 0  | 8  | 6   | 0   | 7     | 10634.6901 | -0.0010          | 10633.7521 | -0.0007          | 10633.7521 | -0.0007          |
| 7  | 1  | 8  | 6   | 1   | 7     | 10634.6672 | -0.0026          | 10633.5632 | -0.0031          | 10633.8981 | 0.0016           |
| 7  | 2  | 8  | 6   | 2   | 7     | 10634.6080 | 0.0017           | 10633.3399 | 0.0020           | 10633.9914 | -0.0067          |
| 7  | 3  | 8  | 6   | 3   | 7     | 10634.4912 | -0.0118          | 10633.0659 | -0.0036          | 10634.0615 | 0.0017           |
| 7  | 0  | 7  | 6   | 0   | 6     | 10634.6901 | 0.0083           | 10633.7521 | -0.0006          | 10633.7521 | -0.0006          |
| 7  | 1  | 7  | 6   | 1   | 6     | 10634.6387 | -0.0025          | 10633.5356 | -0.0021          | 10633.8599 | -0.0079          |
| 7  | 2  | 7  | 6   | 2   | 6     | 10634.6080 | 0.0014           | 10633.2506 | -0.0008          | 10633.9067 | -0.0049          |
| 7  | 3  | 7  | 6   | 3   | 6     |            |                  | 10632.8899 | 0.0032           | 10633.8730 | -0.0039          |
| 7  | 4  | 7  | 6   | 4   | 6     |            |                  | 10632.4551 | 0.0081           |            |                  |
| 7  | 5  | 7  | 6   | 5   | 6     |            |                  | 10631.9322 | -0.0052          |            |                  |
| 7  | 0  | 6  | 6   | 0   | 5     | 10634.6672 | 0.0019           | 10633.7249 | -0.0018          | 10633.7249 | -0.0018          |
| 7  | 1  | 6  | 6   | 1   | 5     | 10634.6515 | 0.0028           |            |                  |            |                  |
| 7  | 2  | 6  | 6   | 2   | 5     | 10634.5965 | -0.0031          |            |                  |            |                  |
| 7  | 3  | 6  | 6   | 3   | 5     | 10634.5188 | -0.0014          |            |                  |            |                  |
| 8  | 0  | 9  | 7   | 0   | 8     | 12153.8882 | 0.0025           | 12152.8142 | 0.0011           | 12152.8142 | 0.0011           |
| 8  | 1  | 9  | 7   | 1   | 8     | 12153.8578 | -0.0012          | 12152.5957 | -0.0021          | 12152.9651 | -0.0099          |
| 8  | 2  | 9  | 7   | 2   | 8     | 12153.7805 | 0.0008           | 12152.3295 | -0.0004          | 12153.0958 | 0.0114           |
| 8  | 3  | 9  | 7   | 3   | 8     | 12153.6515 | 0.0012           | 12152.0119 | -0.0001          | 12153.1440 | 0.0005           |
| 8  | 4  | 9  | 7   | 4   | 8     | 12153.4745 | -0.0003          | 12151.6503 | 0.0025           |            |                  |
| 8  | 0  | 8  | 7   | 0   | 7     | 12153.8882 | 0.0101           | 12152.8142 | 0.0085           | 12152.8142 | 0.0085           |
| 8  | 1  | 8  | 7   | 1   | 7     | 12153.8347 | -0.0039          | 12152.5816 | 0.0042           | 12152.9616 | 0.0070           |
| 8  | 2  | 8  | 7   | 2   | 7     | 12153.7199 | -0.0004          | 12152.2725 | 0.0020           |            |                  |
| 8  | 3  | 8  | 7   | 3   | 7     | 12153.5308 | 0.0050           | 12151.8904 | 0.0030           |            |                  |
| 8  | 4  | 8  | 7   | 4   | 7     |            |                  | 12151.4321 | -0.0001          |            |                  |
| 8  | 0  | 7  | 7   | 0   | 6     | 12153.8578 | -0.0081          | 12152.7975 | 0.0040           | 12152.7975 | 0.0040           |
| 8  | 1  | 7  | 7   | 1   | 6     | 12153.8347 | -0.0073          | 12152.5815 | 0.0006           | 12152.9616 | 0.0035           |
| 8  | 2  | 7  | 7   | 2   | 6     | 12153.7805 | 0.0095           | 12152.3295 | 0.0082           |            |                  |
| 8  | 3  | 7  | 7   | 3   | 6     |            |                  | 12152.0119 | -0.0052          |            |                  |
| 9  | 0  | 10 | 8   | 0   | 9     | 13673.0612 | -0.0019          | 13671.8546 | -0.0020          | 13671.8546 | -0.0018          |
| 9  | 1  | 10 | 8   | 1   | 9     | 13673.0293 | -0.0023          | 13671.6140 | 0.0009           | 13672.0251 | -0.0119          |
| 9  | 2  | 10 | 8   | 2   | 9     | 13672.9384 | 0.0005           | 13671.3037 | -0.0038          | 13672.1586 | 0.0033           |
| 9  | 3  | 10 | 8   | 3   | 9     | 13672.7834 | -0.0015          | 13670.9437 | 0.0013           | 13672.2172 | 0.0030           |
| 9  | 4  | 10 | 8   | 4   | 9     | 13672.5726 | -0.0045          | 13670.5189 | -0.0038          | 13672.2172 | -0.0011          |
| 9  | 5  | 10 | 8   | 5   | 9     | 13672.3207 | -0.0003          | 13670.0623 | 0.0076           |            |                  |
| 9  | 6  | 10 | 8   | 6   | 9     | 13672.0249 | -0.0001          |            |                  |            |                  |
| 9  | 7  | 10 | 8   | 7   | 9     | 13671.7002 | 0.0010           |            |                  |            |                  |
| 9  | 0  | 9  | 8   | 0   | 8     | 13673.0612 | 0.0040           | 13671.8546 | 0.0042           | 13671.8546 | 0.0042           |
| 9  | 1  | 9  | 8   | 1   | 8     | 13673.0140 | -0.0023          | 13671.5956 | -0.0020          | 13672.0251 | 0.0032           |
| 9  | 2  | 9  | 8   | 2   | 8     | 13672.8917 | -0.0036          | 13671.2682 | 0.0038           | 13672.1185 | 0.0059           |
| 9  | 3  | 9  | 8   | 3   | 8     | 13672.6973 | 0.0008           | 13670.8568 | 0.0033           | 13672.1185 | -0.0071          |
| 9  | 4  | 9  | 8   | 4   | 8     | 13672.4182 | -0.0065          | 13670.3685 | -0.0010          | 13672.0666 | 0.0011           |
| 9  | 0  | 8  | 8   | 0   | 8     |            |                  | 13671.8379 | -0.0034          | 13671.8379 | -0.0034          |
| 9  | 1  | 8  | 8   | 1   | 7     | 13673.0140 | -0.0040          | 13671.5956 | -0.0039          | 13672.0251 | 0.0017           |
| 9  | 2  | 8  | 8   | 2   | 7     | 13672.9268 | -0.0026          | 13671.3037 | 0.0047           | 13672.1586 | 0.0119           |
| 9  | 3  | 8  | 8   | 3   | 7     | 13672.7834 | -0.0014          | 13670.9437 | 0.0013           | 13672.2183 | 0.0041           |
| 9  | 4  | 8  | 8   | 4   | 7     | 13672.5868 | -0.0020          | 13670.5316 | -0.0029          | 13672.2183 | -0.0119          |

**Table S5:** Experimental transition frequencies of  $C_6F_6-^{15}NH_3$ . Assignments, measured transition frequencies ( $\nu$ /MHz), and observed-calculated residuals ( $\Delta\nu$ /MHz) from the fit for  $m = 0, 1, -1$ .

|    |    |     |     | m = 0      |             | m = 1      |             | m = -1     |             |
|----|----|-----|-----|------------|-------------|------------|-------------|------------|-------------|
| J' | K' | J'' | K'' | $\nu$      | $\Delta\nu$ | $\nu$      | $\Delta\nu$ | $\nu$      | $\Delta\nu$ |
| 6  | 0  | 5   | 0   | 8996.9833  | -0.0028     | 8996.2062  | -0.0007     | 8996.2062  | -0.0007     |
| 6  | 1  | 5   | 1   | 8996.9625  | -0.0004     | 8996.0426  | 0.0002      | 8996.3257  | 0.0008      |
| 6  | 2  | 5   | 2   | 8996.8967  | 0.0030      | 8995.8336  | 0.0017      | 8996.3933  | -0.0036     |
| 6  | 3  | 5   | 3   | 8996.7854  | 0.0055      | 8995.5826  | 0.0057      |            |             |
| 6  | 4  | 5   | 4   | 8996.6210  | -0.0030     | 8995.2771  | -0.0026     |            |             |
| 6  | 5  | 5   | 5   | 8996.4283  | -0.0009     | 8994.9352  | -0.0085     |            |             |
| 7  | 0  | 6   | 0   | 10496.4469 | -0.0031     | 10495.5396 | -0.0013     | 10495.5396 | -0.0013     |
| 7  | 1  | 6   | 1   | 10496.4217 | -0.0012     | 10495.3471 | -0.0019     | 10495.6788 | 0.0003      |
| 7  | 2  | 6   | 2   | 10496.3456 | 0.0035      | 10495.1068 | 0.0034      | 10495.7590 | -0.0036     |
| 7  | 3  | 6   | 3   | 10496.2114 | 0.0020      | 10494.8120 | 0.0061      |            |             |
| 7  | 4  | 6   | 4   | 10496.0284 | 0.0010      |            |             |            |             |
| 7  | 5  | 6   | 5   | 10495.7975 | -0.0027     |            |             |            |             |
| 7  | 6  | 6   | 6   | 10495.5390 | 0.0064      |            |             |            |             |
| 8  | 0  | 7   | 0   | 11995.8929 | -0.0053     | 11994.8585 | 0.0008      | 11994.8585 | 0.0008      |
| 8  | 1  | 7   | 1   | 11995.8664 | -0.0008     | 11994.6416 | 0.0017      | 11995.0166 | 0.0000      |
| 8  | 2  | 7   | 2   | 11995.7747 | -0.0002     | 11994.3632 | 0.0040      | 11995.1108 | -0.0018     |
| 8  | 3  | 7   | 3   | 11995.6231 | -0.0001     | 11994.0227 | 0.0035      |            |             |
| 8  | 4  | 7   | 4   | 11995.4130 | -0.0023     | 11993.6258 | 0.0029      |            |             |
| 8  | 5  | 7   | 5   | 11995.1520 | -0.0036     | 11993.1664 | -0.0085     |            |             |
| 8  | 6  | 7   | 6   | 11994.8585 | 0.0084      |            |             |            |             |
| 8  | 7  | 7   | 7   | 11994.5026 | -0.0024     |            |             |            |             |

**Table S6:** Experimental frequencies of  $C_5F_5N^{14}NH_3$ . Assignments, measured transition frequencies ( $\nu$ /MHz), and observed-calculated residuals ( $\Delta\nu$ /MHz) from the fit.

| $J'$ | $K_a'$ | $K_c'$ | $F_1'$ | $F'$ | $J''$ | $K_a''$ | $K_c''$ | $F_1''$ | $F''$ | $\nu$ /MHz | $\Delta\nu$ /MHz |
|------|--------|--------|--------|------|-------|---------|---------|---------|-------|------------|------------------|
| 5    | 3      | 3      | 4      | 4    | 4     | 2       | 3       | 3       | 3     | 8878.5270  | -0.0017          |
| 5    | 3      | 3      | 6      | 6    | 4     | 2       | 3       | 5       | 5     | 8878.5795  | 0.0003           |
| 5    | 3      | 3      | 5      | 5    | 4     | 2       | 3       | 4       | 4     | 8878.8458  | -0.0016          |
| 5    | 3      | 3      | 4      | 5    | 4     | 2       | 3       | 3       | 4     | 8878.8603  | 0.0001           |
| 5    | 3      | 3      | 6      | 7    | 4     | 2       | 3       | 5       | 6     | 8878.9158  | 0.0033           |
| 5    | 3      | 3      | 4      | 3    | 4     | 2       | 3       | 3       | 2     | 8878.9480  | -0.0005          |
| 5    | 3      | 3      | 6      | 5    | 4     | 2       | 3       | 5       | 4     | 8878.9846  | -0.0030          |
| 5    | 3      | 3      | 5      | 6    | 4     | 2       | 3       | 4       | 5     | 8879.1664  | -0.0012          |
| 5    | 3      | 3      | 5      | 4    | 4     | 2       | 3       | 4       | 3     | 8879.2510  | -0.0032          |
| 5    | 4      | 1      | 5      | 5    | 4     | 3       | 1       | 4       | 4     | 9093.0790  | 0.0009           |
| 5    | 4      | 1      | 5      | 5    | 4     | 3       | 1       | 5       | 4     | 9093.3300  | -0.0017          |
| 5    | 4      | 1      | 5      | 6    | 4     | 3       | 1       | 4       | 5     | 9093.2918  | -0.0011          |
| 5    | 4      | 1      | 5      | 4    | 4     | 3       | 1       | 4       | 3     | 9093.2918  | 0.0025           |
| 5    | 4      | 1      | 5      | 5    | 4     | 3       | 1       | 3       | 4     | 9093.5734  | -0.0006          |
| 5    | 4      | 1      | 6      | 5    | 4     | 3       | 1       | 4       | 4     | 9093.5477  | -0.0003          |
| 5    | 4      | 1      | 6      | 6    | 4     | 3       | 1       | 5       | 5     | 9093.6590  | 0.0000           |
| 5    | 4      | 1      | 4      | 5    | 4     | 3       | 1       | 5       | 4     | 9093.6773  | 0.0089           |
| 5    | 4      | 1      | 6      | 7    | 4     | 3       | 1       | 5       | 6     | 9093.7263  | -0.0011          |
| 5    | 4      | 1      | 4      | 4    | 4     | 3       | 1       | 3       | 3     | 9093.7757  | 0.0022           |
| 5    | 4      | 1      | 6      | 5    | 4     | 3       | 1       | 5       | 4     | 9093.7992  | -0.0025          |
| 5    | 4      | 1      | 4      | 3    | 4     | 3       | 1       | 3       | 2     | 9093.8373  | -0.0010          |
| 5    | 4      | 1      | 4      | 5    | 4     | 3       | 1       | 3       | 4     | 9093.9108  | 0.0002           |
| 5    | 4      | 2      | 5      | 5    | 4     | 3       | 2       | 4       | 4     | 9197.4642  | -0.0014          |
| 5    | 4      | 2      | 6      | 6    | 4     | 3       | 2       | 5       | 5     | 9197.5491  | -0.0024          |
| 5    | 4      | 2      | 4      | 4    | 4     | 3       | 2       | 3       | 3     | 9197.5761  | 0.0029           |
| 5    | 4      | 2      | 5      | 6    | 4     | 3       | 2       | 4       | 5     | 9197.6130  | -0.0029          |
| 5    | 4      | 2      | 5      | 4    | 4     | 3       | 2       | 4       | 3     | 9197.6327  | -0.0025          |
| 5    | 4      | 2      | 6      | 7    | 4     | 3       | 2       | 5       | 6     | 9197.7153  | 0.0010           |
| 5    | 4      | 2      | 6      | 5    | 4     | 3       | 2       | 5       | 4     | 9197.7235  | -0.0016          |
| 5    | 4      | 2      | 4      | 5    | 4     | 3       | 2       | 3       | 4     | 9197.7326  | 0.0008           |
| 5    | 4      | 2      | 4      | 3    | 4     | 3       | 2       | 3       | 2     | 9197.7526  | -0.0024          |
| 4    | 2      | 2      | 5      | 5    | 3     | 1       | 2       | 4       | 4     | 6792.1297  | -0.0005          |
| 4    | 2      | 2      | 3      | 3    | 3     | 1       | 2       | 2       | 2     | 6792.1697  | -0.0018          |
| 4    | 2      | 2      | 5      | 6    | 3     | 1       | 2       | 4       | 5     | 6792.3684  | 0.0002           |
| 4    | 2      | 2      | 3      | 4    | 3     | 1       | 2       | 2       | 3     | 6792.3843  | -0.0002          |
| 4    | 2      | 2      | 4      | 4    | 3     | 1       | 2       | 3       | 3     | 6792.4348  | 0.0012           |
| 4    | 2      | 2      | 5      | 4    | 3     | 1       | 2       | 4       | 3     | 6792.4160  | 0.0002           |
| 4    | 2      | 2      | 4      | 5    | 3     | 1       | 2       | 3       | 4     | 6792.6366  | -0.0014          |
| 4    | 2      | 2      | 4      | 3    | 3     | 1       | 2       | 3       | 2     | 6792.6938  | -0.0008          |
| 4    | 1      | 3      | 3      | 3    | 3     | 0       | 3       | 2       | 2     | 6920.8261  | 0.0021           |
| 4    | 1      | 3      | 5      | 5    | 3     | 0       | 3       | 4       | 4     | 6921.1303  | -0.0006          |
| 4    | 1      | 3      | 3      | 4    | 3     | 0       | 3       | 2       | 3     | 6921.5673  | 0.0055           |
| 4    | 1      | 3      | 3      | 2    | 3     | 0       | 3       | 2       | 1     | 6921.7372  | 0.0012           |
| 4    | 1      | 3      | 5      | 6    | 3     | 0       | 3       | 4       | 5     | 6921.7920  | -0.0057          |
| 4    | 1      | 3      | 4      | 4    | 3     | 0       | 3       | 3       | 3     | 6922.0737  | -0.0017          |
| 4    | 1      | 3      | 5      | 4    | 3     | 0       | 3       | 4       | 3     | 6922.1173  | 0.0009           |
| 4    | 1      | 3      | 4      | 5    | 3     | 0       | 3       | 3       | 4     | 6922.8911  | 0.0044           |
| 4    | 1      | 3      | 4      | 4    | 3     | 0       | 3       | 4       | 3     | 6923.0772  | 0.0022           |
| 4    | 1      | 3      | 4      | 3    | 3     | 0       | 3       | 3       | 2     | 6923.1336  | 0.0017           |
| 4    | 2      | 3      | 3      | 3    | 3     | 1       | 3       | 2       | 2     | 7073.3486  | 0.0009           |
| 4    | 2      | 3      | 5      | 5    | 3     | 1       | 3       | 4       | 4     | 7073.5415  | -0.0018          |
| 4    | 2      | 3      | 3      | 4    | 3     | 1       | 3       | 3       | 3     | 7073.5804  | 0.0012           |
| 4    | 2      | 3      | 4      | 4    | 3     | 1       | 3       | 3       | 3     | 7073.9705  | -0.0016          |
| 4    | 2      | 3      | 3      | 4    | 3     | 1       | 3       | 2       | 3     | 7074.0855  | 0.0077           |
| 4    | 2      | 3      | 5      | 6    | 3     | 1       | 3       | 4       | 5     | 7074.1637  | -0.0024          |
| 4    | 2      | 3      | 3      | 2    | 3     | 1       | 3       | 2       | 1     | 7074.1861  | 0.0007           |
| 4    | 2      | 3      | 5      | 4    | 3     | 1       | 3       | 4       | 3     | 7074.5148  | 0.0013           |
| 4    | 2      | 3      | 4      | 5    | 3     | 1       | 3       | 3       | 4     | 7074.8369  | 0.0022           |
| 4    | 2      | 3      | 4      | 3    | 3     | 1       | 3       | 3       | 2     | 7075.0508  | 0.0013           |
| 4    | 3      | 1      | 4      | 4    | 3     | 2       | 1       | 3       | 3     | 7089.2089  | 0.0014           |
| 4    | 3      | 1      | 4      | 5    | 3     | 2       | 1       | 3       | 4     | 7089.2562  | -0.0019          |
| 4    | 3      | 1      | 4      | 3    | 3     | 2       | 1       | 3       | 2     | 7089.2562  | -0.0010          |
| 4    | 3      | 1      | 5      | 5    | 3     | 2       | 1       | 4       | 4     | 7089.6312  | -0.0004          |
| 4    | 3      | 1      | 5      | 4    | 3     | 2       | 1       | 4       | 3     | 7089.6762  | -0.0015          |
| 4    | 3      | 1      | 5      | 6    | 3     | 2       | 1       | 4       | 5     | 7089.7092  | -0.0029          |
| 4    | 3      | 1      | 3      | 3    | 3     | 2       | 1       | 2       | 2     | 7089.8333  | -0.0010          |
| 4    | 3      | 1      | 3      | 4    | 3     | 2       | 1       | 2       | 3     | 7089.9169  | -0.0015          |
| 4    | 3      | 1      | 3      | 2    | 3     | 2       | 1       | 2       | 1     | 7089.9169  | 0.0028           |
| 4    | 3      | 2      | 3      | 3    | 3     | 2       | 2       | 2       | 2     | 7273.6974  | -0.0037          |
| 4    | 3      | 2      | 5      | 5    | 3     | 2       | 2       | 4       | 4     | 7273.7211  | 0.0032           |
| 4    | 3      | 2      | 4      | 4    | 3     | 2       | 2       | 3       | 3     | 7273.7771  | -0.0010          |
| 4    | 3      | 2      | 3      | 4    | 3     | 2       | 2       | 2       | 3     | 7273.9986  | -0.0042          |
| 4    | 3      | 2      | 5      | 6    | 3     | 2       | 2       | 4       | 5     | 7274.0166  | 0.0006           |
| 4    | 3      | 2      | 3      | 2    | 3     | 2       | 2       | 2       | 1     | 7274.0697  | -0.0044          |
| 4    | 3      | 2      | 4      | 5    | 3     | 2       | 2       | 3       | 4     | 7274.0836  | -0.0031          |
| 4    | 3      | 2      | 5      | 4    | 3     | 2       | 2       | 4       | 3     | 7274.0981  | 0.0004           |
| 4    | 3      | 2      | 4      | 3    | 3     | 2       | 2       | 3       | 2     | 7274.1602  | -0.0015          |
| 4    | 4      | 0      | 4      | 4    | 3     | 3       | 0       | 3       | 3     | 7688.6636  | 0.0116           |
| 4    | 4      | 0      | 4      | 5    | 3     | 3       | 0       | 3       | 4     | 7688.7767  | 0.0000           |
| 4    | 4      | 0      | 5      | 5    | 3     | 3       | 0       | 4       | 4     | 7688.8578  | -0.0005          |
| 4    | 4      | 0      | 5      | 4    | 3     | 3       | 0       | 4       | 3     | 7688.9242  | -0.0001          |



|   |   |   |   |   |   |   |   |   |   |            |         |
|---|---|---|---|---|---|---|---|---|---|------------|---------|
| 4 | 4 | 0 | 3 | 2 | 3 | 3 | 0 | 2 | 1 | 7688.9242  | -0.0035 |
| 4 | 4 | 0 | 5 | 6 | 3 | 3 | 0 | 4 | 5 | 7688.9681  | -0.0006 |
| 4 | 4 | 0 | 3 | 4 | 3 | 3 | 0 | 2 | 3 | 7688.9849  | -0.0016 |
| 4 | 4 | 1 | 4 | 4 | 3 | 3 | 1 | 3 | 3 | 7708.5202  | 0.0003  |
| 4 | 4 | 1 | 4 | 3 | 3 | 3 | 1 | 3 | 2 | 7708.6731  | 0.0021  |
| 4 | 4 | 1 | 4 | 5 | 3 | 3 | 1 | 3 | 4 | 7708.6597  | -0.0013 |
| 4 | 4 | 1 | 5 | 5 | 3 | 3 | 1 | 4 | 4 | 7708.6332  | 0.0014  |
| 4 | 4 | 1 | 3 | 3 | 3 | 3 | 1 | 2 | 2 | 7708.5429  | -0.0030 |
| 4 | 4 | 1 | 3 | 2 | 3 | 3 | 1 | 2 | 1 | 7708.6731  | -0.0019 |
| 4 | 4 | 1 | 5 | 4 | 3 | 3 | 1 | 4 | 3 | 7708.7086  | -0.0018 |
| 4 | 4 | 1 | 3 | 4 | 3 | 3 | 1 | 2 | 3 | 7708.7376  | 0.0000  |
| 4 | 4 | 1 | 5 | 6 | 3 | 3 | 1 | 4 | 5 | 7708.7567  | 0.0056  |
| 5 | 2 | 3 | 4 | 4 | 4 | 1 | 3 | 3 | 3 | 8517.2331  | -0.0030 |
| 5 | 2 | 3 | 6 | 6 | 4 | 1 | 3 | 5 | 5 | 8517.3095  | 0.0007  |
| 5 | 2 | 3 | 4 | 5 | 4 | 1 | 3 | 3 | 4 | 8517.5143  | -0.0004 |
| 5 | 2 | 3 | 6 | 7 | 4 | 1 | 3 | 5 | 6 | 8517.6114  | -0.0023 |
| 5 | 2 | 3 | 4 | 3 | 4 | 1 | 3 | 3 | 2 | 8517.6057  | 0.0013  |
| 5 | 2 | 3 | 6 | 5 | 4 | 1 | 3 | 5 | 4 | 8517.6796  | 0.0021  |
| 5 | 2 | 3 | 5 | 5 | 4 | 1 | 3 | 4 | 4 | 8517.9279  | -0.0003 |
| 5 | 2 | 3 | 5 | 6 | 4 | 1 | 3 | 4 | 5 | 8518.2068  | -0.0006 |
| 5 | 2 | 3 | 5 | 4 | 4 | 1 | 3 | 4 | 3 | 8518.2703  | -0.0005 |
| 5 | 3 | 2 | 5 | 5 | 4 | 2 | 2 | 4 | 4 | 8567.3498  | -0.0016 |
| 5 | 3 | 2 | 5 | 6 | 4 | 2 | 2 | 4 | 5 | 8567.4482  | -0.0021 |
| 5 | 3 | 2 | 6 | 6 | 4 | 2 | 2 | 5 | 5 | 8567.4878  | 0.0003  |
| 5 | 3 | 2 | 5 | 4 | 4 | 2 | 2 | 4 | 3 | 8567.4666  | 0.0051  |
| 5 | 3 | 2 | 4 | 4 | 4 | 2 | 2 | 3 | 3 | 8567.5873  | -0.0004 |
| 5 | 3 | 2 | 6 | 7 | 4 | 2 | 2 | 5 | 6 | 8567.5873  | -0.0013 |
| 5 | 3 | 2 | 6 | 5 | 4 | 2 | 2 | 5 | 4 | 8567.6004  | 0.0038  |
| 5 | 3 | 2 | 4 | 5 | 4 | 2 | 2 | 3 | 4 | 8567.6874  | -0.0022 |
| 5 | 3 | 2 | 4 | 3 | 4 | 2 | 2 | 3 | 2 | 8567.7002  | 0.0002  |
| 5 | 1 | 4 | 4 | 4 | 4 | 0 | 4 | 3 | 3 | 8737.1268  | 0.0009  |
| 5 | 1 | 4 | 6 | 6 | 4 | 0 | 4 | 5 | 5 | 8737.3180  | 0.0010  |
| 5 | 1 | 4 | 4 | 5 | 4 | 0 | 4 | 3 | 4 | 8737.7774  | -0.0020 |
| 5 | 1 | 4 | 4 | 3 | 4 | 0 | 4 | 3 | 2 | 8737.8605  | -0.0011 |
| 5 | 1 | 4 | 6 | 7 | 4 | 0 | 4 | 5 | 6 | 8737.8908  | -0.0069 |
| 5 | 1 | 4 | 5 | 5 | 4 | 0 | 4 | 4 | 4 | 8738.0178  | 0.0031  |
| 5 | 1 | 4 | 6 | 5 | 4 | 0 | 4 | 5 | 4 | 8738.1460  | -0.0005 |
| 5 | 1 | 4 | 5 | 6 | 4 | 0 | 4 | 4 | 5 | 8738.7647  | 0.0027  |
| 5 | 1 | 4 | 5 | 4 | 4 | 0 | 4 | 4 | 3 | 8738.9168  | 0.0000  |
| 5 | 2 | 4 | 4 | 4 | 4 | 1 | 4 | 3 | 3 | 8797.8479  | 0.0000  |
| 5 | 2 | 4 | 6 | 6 | 4 | 1 | 4 | 5 | 5 | 8798.0200  | 0.0060  |
| 5 | 2 | 4 | 5 | 5 | 4 | 1 | 4 | 4 | 4 | 8798.5381  | 0.0026  |
| 5 | 2 | 4 | 4 | 5 | 4 | 1 | 4 | 3 | 4 | 8798.5156  | -0.0001 |
| 5 | 2 | 4 | 6 | 7 | 4 | 1 | 4 | 5 | 6 | 8798.5881  | -0.0045 |
| 5 | 2 | 4 | 6 | 5 | 4 | 1 | 4 | 5 | 4 | 8798.8407  | -0.0021 |
| 5 | 2 | 4 | 5 | 6 | 4 | 1 | 4 | 4 | 5 | 8799.2891  | -0.0035 |
| 5 | 2 | 4 | 5 | 4 | 4 | 1 | 4 | 4 | 3 | 8799.4550  | 0.0014  |
| 5 | 5 | 0 | 5 | 5 | 4 | 4 | 0 | 4 | 4 | 9688.9051  | 0.0000  |
| 5 | 5 | 0 | 5 | 4 | 4 | 4 | 0 | 4 | 3 | 9689.0274  | -0.0010 |
| 5 | 5 | 0 | 4 | 4 | 4 | 4 | 0 | 3 | 3 | 9688.9454  | 0.0014  |
| 5 | 5 | 0 | 4 | 3 | 4 | 4 | 0 | 3 | 2 | 9689.0560  | 0.0002  |
| 5 | 5 | 0 | 6 | 5 | 4 | 4 | 0 | 5 | 4 | 9689.0769  | 0.0014  |
| 5 | 5 | 0 | 4 | 5 | 4 | 4 | 0 | 3 | 4 | 9689.0907  | -0.0036 |
| 5 | 5 | 0 | 6 | 7 | 4 | 4 | 0 | 5 | 6 | 9689.1032  | 0.0008  |
| 5 | 5 | 1 | 5 | 5 | 4 | 4 | 1 | 4 | 4 | 9694.3088  | 0.0003  |
| 5 | 5 | 1 | 5 | 4 | 4 | 4 | 1 | 4 | 3 | 9694.4177  | 0.0002  |
| 5 | 5 | 1 | 5 | 6 | 4 | 4 | 1 | 4 | 5 | 9694.4177  | 0.0001  |
| 5 | 5 | 1 | 4 | 4 | 4 | 4 | 1 | 3 | 3 | 9694.3332  | -0.0017 |
| 5 | 5 | 1 | 6 | 6 | 4 | 4 | 1 | 5 | 5 | 9694.3879  | 0.0004  |
| 5 | 5 | 1 | 4 | 3 | 4 | 4 | 1 | 3 | 2 | 9694.4385  | 0.0070  |
| 5 | 5 | 1 | 6 | 5 | 4 | 4 | 1 | 5 | 4 | 9694.4551  | -0.0012 |
| 5 | 5 | 1 | 4 | 5 | 4 | 4 | 1 | 3 | 4 | 9694.4697  | -0.0020 |
| 5 | 5 | 1 | 6 | 7 | 4 | 4 | 1 | 5 | 6 | 9694.4842  | 0.0000  |
| 6 | 3 | 3 | 7 | 7 | 5 | 2 | 3 | 6 | 6 | 10166.0118 | -0.0004 |
| 6 | 3 | 3 | 5 | 5 | 5 | 2 | 3 | 4 | 4 | 10166.0280 | 0.0013  |
| 6 | 3 | 3 | 7 | 8 | 5 | 2 | 3 | 6 | 7 | 10166.1600 | -0.0016 |
| 6 | 3 | 3 | 5 | 6 | 5 | 2 | 3 | 4 | 5 | 10166.1709 | -0.0005 |
| 6 | 3 | 3 | 7 | 6 | 5 | 2 | 3 | 6 | 5 | 10166.1830 | 0.0027  |
| 6 | 3 | 3 | 6 | 6 | 5 | 2 | 3 | 5 | 5 | 10166.2069 | 0.0012  |
| 6 | 3 | 3 | 5 | 4 | 5 | 2 | 3 | 4 | 3 | 10166.1949 | -0.0029 |
| 6 | 3 | 3 | 6 | 7 | 5 | 2 | 3 | 5 | 6 | 10166.3466 | -0.0006 |
| 6 | 3 | 3 | 6 | 5 | 5 | 2 | 3 | 5 | 4 | 10166.3673 | -0.0018 |
| 6 | 2 | 4 | 5 | 5 | 5 | 1 | 4 | 4 | 4 | 10340.9821 | -0.0021 |
| 6 | 2 | 4 | 7 | 7 | 5 | 1 | 4 | 6 | 6 | 10341.1074 | 0.0021  |
| 6 | 2 | 4 | 5 | 6 | 5 | 1 | 4 | 4 | 5 | 10341.3699 | 0.0011  |
| 6 | 2 | 4 | 5 | 4 | 5 | 1 | 4 | 4 | 3 | 10341.4432 | -0.0071 |
| 6 | 2 | 4 | 7 | 8 | 5 | 1 | 4 | 6 | 7 | 10341.4859 | 0.0021  |
| 6 | 2 | 4 | 7 | 6 | 5 | 1 | 4 | 6 | 5 | 10341.5596 | 0.0021  |
| 6 | 2 | 4 | 6 | 6 | 5 | 1 | 4 | 5 | 5 | 10341.8323 | 0.0009  |
| 6 | 2 | 4 | 6 | 7 | 5 | 1 | 4 | 5 | 6 | 10342.2000 | -0.0019 |
| 6 | 2 | 4 | 6 | 5 | 5 | 1 | 4 | 5 | 4 | 10342.2923 | 0.0027  |
| 6 | 4 | 2 | 6 | 6 | 5 | 3 | 2 | 5 | 5 | 10480.3122 | 0.0004  |
| 6 | 4 | 2 | 6 | 7 | 5 | 3 | 2 | 5 | 6 | 10480.3567 | -0.0009 |
| 6 | 4 | 2 | 6 | 5 | 5 | 3 | 2 | 5 | 4 | 10480.3567 | 0.0004  |
| 6 | 4 | 2 | 7 | 7 | 5 | 3 | 2 | 6 | 6 | 10480.6932 | 0.0013  |
| 6 | 4 | 2 | 7 | 6 | 5 | 3 | 2 | 6 | 5 | 10480.7399 | 0.0054  |

|   |   |   |   |   |   |   |   |   |   |            |         |
|---|---|---|---|---|---|---|---|---|---|------------|---------|
| 6 | 4 | 2 | 7 | 8 | 5 | 3 | 2 | 6 | 7 | 10480.7399 | 0.0016  |
| 6 | 4 | 2 | 5 | 5 | 5 | 3 | 2 | 4 | 4 | 10480.7999 | 0.0020  |
| 6 | 4 | 2 | 5 | 6 | 5 | 3 | 2 | 4 | 5 | 10480.8448 | -0.0013 |
| 6 | 4 | 2 | 5 | 4 | 5 | 3 | 2 | 4 | 3 | 10480.8448 | 0.0019  |
| 6 | 1 | 5 | 5 | 5 | 5 | 0 | 5 | 4 | 4 | 10529.6547 | 0.0009  |
| 6 | 1 | 5 | 7 | 7 | 5 | 0 | 5 | 6 | 6 | 10529.7947 | -0.0014 |
| 6 | 1 | 5 | 5 | 6 | 5 | 0 | 5 | 4 | 5 | 10530.2667 | 0.0005  |
| 6 | 1 | 5 | 5 | 4 | 5 | 0 | 5 | 4 | 3 | 10530.3243 | 0.0088  |
| 6 | 1 | 5 | 6 | 6 | 5 | 0 | 5 | 5 | 5 | 10530.3788 | 0.0007  |
| 6 | 1 | 5 | 7 | 8 | 5 | 0 | 5 | 6 | 7 | 10530.3378 | 0.0038  |
| 6 | 1 | 5 | 7 | 6 | 5 | 0 | 5 | 6 | 5 | 10530.5209 | -0.0045 |
| 6 | 1 | 5 | 6 | 7 | 5 | 0 | 5 | 5 | 6 | 10531.0616 | 0.0034  |
| 6 | 1 | 5 | 6 | 5 | 5 | 0 | 5 | 5 | 4 | 10531.1832 | 0.0012  |
| 6 | 3 | 4 | 5 | 5 | 5 | 2 | 4 | 4 | 4 | 10548.8693 | 0.0015  |
| 6 | 3 | 4 | 7 | 7 | 5 | 2 | 4 | 6 | 6 | 10548.9318 | -0.0010 |
| 6 | 2 | 5 | 5 | 5 | 5 | 1 | 5 | 4 | 4 | 10549.3085 | 0.0087  |
| 6 | 3 | 4 | 5 | 6 | 5 | 2 | 4 | 4 | 5 | 10549.2153 | -0.0002 |
| 6 | 3 | 4 | 6 | 6 | 5 | 2 | 4 | 5 | 5 | 10549.3085 | -0.0013 |
| 6 | 3 | 4 | 7 | 8 | 5 | 2 | 4 | 6 | 7 | 10549.2760 | -0.0010 |
| 6 | 3 | 4 | 5 | 4 | 5 | 2 | 4 | 4 | 3 | 10549.2760 | -0.0119 |
| 6 | 2 | 5 | 7 | 7 | 5 | 1 | 5 | 6 | 6 | 10549.4352 | 0.0018  |
| 6 | 3 | 4 | 7 | 6 | 5 | 2 | 4 | 6 | 5 | 10549.3526 | 0.0004  |
| 6 | 3 | 4 | 6 | 7 | 5 | 2 | 4 | 5 | 6 | 10549.6598 | 0.0028  |
| 6 | 3 | 4 | 6 | 5 | 5 | 2 | 4 | 5 | 4 | 10549.7334 | 0.0004  |
| 6 | 2 | 5 | 5 | 6 | 5 | 1 | 5 | 4 | 5 | 10549.9100 | 0.0022  |
| 6 | 2 | 5 | 6 | 6 | 5 | 1 | 5 | 5 | 5 | 10549.9594 | 0.0000  |
| 6 | 2 | 5 | 7 | 8 | 5 | 1 | 5 | 6 | 7 | 10549.9723 | 0.0062  |
| 6 | 2 | 5 | 5 | 4 | 5 | 1 | 5 | 4 | 3 | 10549.9519 | -0.0040 |
| 6 | 2 | 5 | 7 | 6 | 5 | 1 | 5 | 6 | 5 | 10550.1567 | 0.0005  |
| 6 | 2 | 5 | 6 | 7 | 5 | 1 | 5 | 5 | 6 | 10550.6293 | -0.0048 |
| 6 | 2 | 5 | 6 | 5 | 5 | 1 | 5 | 5 | 4 | 10550.7558 | -0.0016 |
| 6 | 4 | 3 | 7 | 7 | 5 | 3 | 3 | 6 | 6 | 10736.3430 | 0.0000  |
| 6 | 4 | 3 | 5 | 5 | 5 | 3 | 3 | 4 | 4 | 10736.3528 | -0.0001 |
| 6 | 4 | 3 | 6 | 6 | 5 | 3 | 3 | 5 | 5 | 10736.3863 | -0.0001 |
| 6 | 4 | 3 | 5 | 6 | 5 | 3 | 3 | 4 | 5 | 10736.5221 | -0.0031 |
| 6 | 4 | 3 | 7 | 8 | 5 | 3 | 3 | 6 | 7 | 10736.5221 | -0.0049 |
| 6 | 4 | 3 | 7 | 6 | 5 | 3 | 3 | 6 | 5 | 10736.5493 | 0.0080  |
| 6 | 4 | 3 | 6 | 7 | 5 | 3 | 3 | 5 | 6 | 10736.5493 | 0.0049  |
| 6 | 5 | 1 | 6 | 6 | 5 | 4 | 1 | 5 | 5 | 11117.7681 | 0.0006  |
| 6 | 5 | 1 | 6 | 5 | 5 | 4 | 1 | 5 | 4 | 11117.8184 | -0.0002 |
| 6 | 5 | 1 | 6 | 7 | 5 | 4 | 1 | 5 | 6 | 11117.8184 | -0.0019 |
| 6 | 5 | 1 | 7 | 7 | 5 | 4 | 1 | 6 | 6 | 11118.0223 | -0.0003 |
| 6 | 5 | 1 | 5 | 5 | 5 | 4 | 1 | 4 | 4 | 11118.0712 | -0.0005 |
| 6 | 5 | 1 | 7 | 6 | 5 | 4 | 1 | 6 | 5 | 11118.0831 | 0.0013  |
| 6 | 5 | 1 | 7 | 8 | 5 | 4 | 1 | 6 | 7 | 11118.0968 | -0.0007 |
| 6 | 5 | 1 | 5 | 6 | 5 | 4 | 1 | 4 | 5 | 11118.1360 | -0.0029 |
| 6 | 5 | 1 | 5 | 4 | 5 | 4 | 1 | 4 | 3 | 11118.1481 | 0.0031  |
| 6 | 5 | 2 | 6 | 6 | 5 | 4 | 2 | 5 | 5 | 11158.1410 | -0.0013 |
| 6 | 5 | 2 | 6 | 7 | 5 | 4 | 2 | 5 | 6 | 11158.2428 | 0.0001  |
| 6 | 5 | 2 | 6 | 5 | 5 | 4 | 2 | 5 | 4 | 11158.2428 | -0.0032 |
| 6 | 5 | 2 | 7 | 7 | 5 | 4 | 2 | 6 | 6 | 11158.2804 | -0.0003 |
| 6 | 5 | 2 | 5 | 5 | 5 | 4 | 2 | 4 | 4 | 11158.2991 | -0.0030 |
| 6 | 5 | 2 | 7 | 6 | 5 | 4 | 2 | 6 | 5 | 11158.3866 | 0.0017  |
| 6 | 5 | 2 | 7 | 8 | 5 | 4 | 2 | 6 | 7 | 11158.3866 | 0.0005  |
| 6 | 5 | 2 | 5 | 6 | 5 | 4 | 2 | 4 | 5 | 11158.4071 | -0.0001 |
| 6 | 5 | 2 | 5 | 4 | 5 | 4 | 2 | 4 | 3 | 11158.4071 | -0.0038 |
| 6 | 6 | 0 | 6 | 6 | 5 | 5 | 0 | 5 | 5 | 11683.7063 | 0.0006  |
| 6 | 6 | 0 | 6 | 5 | 5 | 5 | 0 | 5 | 4 | 11683.7893 | 0.0034  |
| 6 | 6 | 0 | 6 | 7 | 5 | 5 | 0 | 5 | 6 | 11683.7893 | -0.0003 |
| 6 | 6 | 0 | 5 | 5 | 5 | 5 | 0 | 4 | 4 | 11683.7301 | 0.0000  |
| 6 | 6 | 0 | 7 | 7 | 5 | 5 | 0 | 6 | 6 | 11683.7656 | -0.0005 |
| 6 | 6 | 0 | 5 | 4 | 5 | 5 | 0 | 4 | 3 | 11683.8017 | -0.0008 |
| 6 | 6 | 0 | 7 | 6 | 5 | 5 | 0 | 6 | 5 | 11683.8017 | 0.0046  |
| 6 | 6 | 0 | 5 | 6 | 5 | 5 | 0 | 6 | 5 | 11683.8198 | -0.0024 |
| 6 | 6 | 0 | 7 | 6 | 5 | 5 | 0 | 4 | 5 | 11683.8295 | -0.0010 |
| 6 | 6 | 0 | 7 | 8 | 5 | 5 | 0 | 6 | 7 | 11683.8423 | 0.0000  |
| 6 | 6 | 1 | 6 | 6 | 5 | 5 | 1 | 5 | 5 | 11685.0058 | 0.0015  |
| 6 | 6 | 1 | 6 | 5 | 5 | 5 | 1 | 5 | 4 | 11685.0837 | 0.0017  |
| 6 | 6 | 1 | 6 | 7 | 5 | 5 | 1 | 5 | 6 | 11685.0837 | -0.0023 |
| 6 | 6 | 1 | 5 | 5 | 5 | 5 | 1 | 4 | 4 | 11685.0233 | -0.0024 |
| 6 | 6 | 1 | 7 | 7 | 5 | 5 | 1 | 6 | 6 | 11685.0630 | 0.0005  |
| 6 | 6 | 1 | 5 | 6 | 5 | 5 | 1 | 6 | 5 | 11685.1150 | -0.0007 |
| 6 | 6 | 1 | 7 | 6 | 5 | 5 | 1 | 4 | 5 | 11685.1245 | 0.0005  |
| 6 | 6 | 1 | 7 | 8 | 5 | 5 | 1 | 6 | 7 | 11685.1343 | -0.0020 |
| 7 | 3 | 4 | 6 | 6 | 6 | 2 | 4 | 5 | 5 | 11902.5797 | 0.0010  |
| 7 | 3 | 4 | 8 | 8 | 6 | 2 | 4 | 7 | 7 | 11902.6201 | 0.0015  |
| 7 | 3 | 4 | 6 | 7 | 6 | 2 | 4 | 5 | 6 | 11902.7804 | 0.0015  |
| 7 | 3 | 4 | 6 | 5 | 6 | 2 | 4 | 5 | 4 | 11902.8134 | -0.0019 |
| 7 | 3 | 4 | 8 | 9 | 6 | 2 | 4 | 7 | 8 | 11902.8288 | 0.0037  |
| 7 | 3 | 4 | 8 | 7 | 6 | 2 | 4 | 7 | 6 | 11902.8519 | -0.0004 |
| 7 | 3 | 4 | 7 | 7 | 6 | 2 | 4 | 6 | 6 | 11903.0791 | 0.0026  |
| 7 | 3 | 4 | 7 | 8 | 6 | 2 | 4 | 6 | 7 | 11903.2744 | 0.0005  |
| 7 | 3 | 4 | 7 | 6 | 6 | 2 | 4 | 6 | 5 | 11903.3042 | 0.0001  |
| 7 | 4 | 3 | 7 | 7 | 6 | 3 | 3 | 6 | 6 | 11938.9705 | 0.0025  |
| 7 | 4 | 3 | 7 | 8 | 6 | 3 | 3 | 6 | 7 | 11939.0331 | -0.0006 |
| 7 | 4 | 3 | 7 | 6 | 6 | 3 | 3 | 6 | 5 | 11939.0331 | -0.0049 |

|   |   |   |   |   |   |   |   |   |   |            |         |
|---|---|---|---|---|---|---|---|---|---|------------|---------|
| 7 | 4 | 3 | 8 | 8 | 6 | 3 | 3 | 7 | 7 | 11939.1001 | 0.0011  |
| 7 | 4 | 3 | 6 | 6 | 6 | 3 | 3 | 5 | 5 | 11939.1525 | -0.0014 |
| 7 | 4 | 3 | 8 | 9 | 6 | 3 | 3 | 7 | 8 | 11939.1694 | 0.0043  |
| 7 | 4 | 3 | 8 | 7 | 6 | 3 | 3 | 7 | 6 | 11939.1694 | 0.0006  |
| 7 | 4 | 3 | 6 | 7 | 6 | 3 | 3 | 5 | 6 | 11939.2214 | 0.0011  |
| 7 | 4 | 3 | 6 | 5 | 6 | 3 | 3 | 5 | 4 | 11939.2214 | -0.0030 |
| 7 | 2 | 5 | 8 | 8 | 6 | 1 | 5 | 7 | 7 | 12179.5814 | -0.0052 |
| 7 | 2 | 5 | 6 | 7 | 6 | 1 | 5 | 5 | 6 | 12179.8633 | -0.0027 |
| 7 | 2 | 5 | 6 | 5 | 6 | 1 | 5 | 5 | 4 | 12179.9221 | -0.0063 |
| 7 | 2 | 5 | 8 | 9 | 6 | 1 | 5 | 7 | 8 | 12179.9474 | -0.0030 |
| 7 | 2 | 5 | 8 | 7 | 6 | 1 | 5 | 7 | 6 | 12180.0242 | 0.0029  |
| 7 | 2 | 5 | 7 | 7 | 6 | 1 | 5 | 6 | 6 | 12180.1889 | -0.0005 |
| 7 | 2 | 5 | 7 | 8 | 6 | 1 | 5 | 6 | 7 | 12180.5607 | -0.0010 |
| 7 | 2 | 5 | 7 | 6 | 6 | 1 | 5 | 6 | 5 | 12180.6311 | 0.0003  |
| 7 | 3 | 5 | 6 | 6 | 6 | 2 | 5 | 5 | 5 | 12269.6481 | -0.0018 |
| 7 | 3 | 5 | 8 | 8 | 6 | 2 | 5 | 7 | 7 | 12269.7193 | -0.0018 |
| 7 | 3 | 5 | 6 | 7 | 6 | 2 | 5 | 5 | 6 | 12270.0173 | 0.0001  |
| 7 | 3 | 5 | 8 | 9 | 6 | 2 | 5 | 7 | 8 | 12270.0749 | -0.0020 |
| 7 | 3 | 5 | 6 | 5 | 6 | 2 | 5 | 5 | 4 | 12270.0749 | -0.0008 |
| 7 | 3 | 5 | 7 | 7 | 6 | 2 | 5 | 6 | 6 | 12270.1575 | -0.0008 |
| 7 | 3 | 5 | 8 | 7 | 6 | 2 | 5 | 7 | 6 | 12270.1438 | -0.0038 |
| 7 | 3 | 5 | 7 | 8 | 6 | 2 | 5 | 6 | 7 | 12270.5284 | 0.0021  |
| 7 | 3 | 5 | 7 | 6 | 6 | 2 | 5 | 6 | 5 | 12270.5959 | -0.0003 |
| 7 | 1 | 6 | 6 | 6 | 6 | 0 | 6 | 5 | 5 | 12306.1943 | -0.0016 |
| 7 | 1 | 6 | 8 | 8 | 6 | 0 | 6 | 7 | 7 | 12306.3006 | -0.0037 |
| 7 | 1 | 6 | 6 | 7 | 6 | 0 | 6 | 5 | 6 | 12306.7464 | -0.0025 |
| 7 | 1 | 6 | 7 | 7 | 6 | 0 | 6 | 6 | 6 | 12306.8224 | 0.0021  |
| 7 | 1 | 6 | 8 | 9 | 6 | 0 | 6 | 7 | 8 | 12306.7984 | 0.0034  |
| 7 | 1 | 6 | 6 | 5 | 6 | 0 | 6 | 5 | 4 | 12306.7855 | 0.0019  |
| 7 | 1 | 6 | 8 | 7 | 6 | 0 | 6 | 7 | 6 | 12306.9449 | 0.0009  |
| 7 | 1 | 6 | 7 | 8 | 6 | 0 | 6 | 6 | 7 | 12307.4234 | -0.0018 |
| 7 | 1 | 6 | 7 | 6 | 6 | 0 | 6 | 6 | 5 | 12307.5220 | -0.0002 |
| 7 | 2 | 6 | 6 | 6 | 6 | 1 | 6 | 5 | 5 | 12311.8026 | -0.0033 |
| 7 | 2 | 6 | 8 | 8 | 6 | 1 | 6 | 7 | 7 | 12311.9130 | 0.0007  |
| 7 | 2 | 6 | 6 | 7 | 6 | 1 | 6 | 5 | 6 | 12312.3573 | 0.0002  |
| 7 | 2 | 6 | 7 | 7 | 6 | 1 | 6 | 6 | 6 | 12312.4141 | 0.0006  |
| 7 | 2 | 6 | 8 | 9 | 6 | 1 | 6 | 7 | 8 | 12312.4043 | 0.0031  |
| 7 | 2 | 6 | 6 | 5 | 6 | 1 | 6 | 5 | 4 | 12312.3905 | -0.0012 |
| 7 | 2 | 6 | 8 | 7 | 6 | 1 | 6 | 7 | 6 | 12312.5517 | 0.0020  |
| 7 | 2 | 6 | 7 | 8 | 6 | 1 | 6 | 6 | 7 | 12313.0160 | 0.0000  |
| 7 | 2 | 6 | 7 | 6 | 6 | 1 | 6 | 6 | 5 | 12313.1111 | -0.0018 |
| 7 | 4 | 4 | 6 | 6 | 6 | 3 | 4 | 5 | 5 | 12339.3903 | -0.0036 |
| 7 | 4 | 4 | 8 | 8 | 6 | 3 | 4 | 7 | 7 | 12339.4069 | 0.0036  |
| 7 | 4 | 4 | 7 | 7 | 6 | 3 | 4 | 6 | 6 | 12339.5567 | -0.0018 |
| 7 | 4 | 4 | 6 | 7 | 6 | 3 | 4 | 5 | 6 | 12339.5908 | 0.0017  |
| 7 | 4 | 4 | 8 | 9 | 6 | 3 | 4 | 7 | 8 | 12339.6038 | -0.0010 |
| 7 | 4 | 4 | 6 | 5 | 6 | 3 | 4 | 5 | 4 | 12339.6220 | -0.0036 |
| 7 | 4 | 4 | 8 | 7 | 6 | 3 | 4 | 7 | 6 | 12339.6357 | 0.0028  |
| 7 | 4 | 4 | 7 | 8 | 6 | 3 | 4 | 6 | 7 | 12339.7514 | -0.0001 |
| 7 | 4 | 4 | 7 | 6 | 6 | 3 | 4 | 6 | 5 | 12339.7799 | -0.0017 |
| 7 | 5 | 2 | 7 | 7 | 6 | 4 | 2 | 6 | 6 | 12501.9715 | 0.0065  |
| 7 | 5 | 2 | 7 | 8 | 6 | 4 | 2 | 6 | 7 | 12501.9715 | -0.0010 |
| 7 | 5 | 2 | 7 | 6 | 6 | 4 | 2 | 6 | 5 | 12501.9715 | 0.0005  |
| 7 | 5 | 2 | 8 | 8 | 6 | 4 | 2 | 7 | 7 | 12502.3165 | -0.0007 |
| 7 | 5 | 2 | 8 | 7 | 6 | 4 | 2 | 7 | 6 | 12502.3347 | -0.0002 |
| 7 | 5 | 2 | 8 | 9 | 6 | 4 | 2 | 7 | 8 | 12502.3590 | -0.0008 |
| 7 | 5 | 2 | 6 | 6 | 6 | 4 | 2 | 5 | 5 | 12502.3945 | 0.0012  |
| 7 | 5 | 2 | 6 | 7 | 6 | 4 | 2 | 5 | 6 | 12502.4227 | -0.0014 |
| 7 | 5 | 2 | 6 | 5 | 6 | 4 | 2 | 5 | 4 | 12502.4338 | -0.0004 |
| 7 | 5 | 3 | 8 | 8 | 6 | 4 | 3 | 7 | 7 | 12648.4184 | -0.0025 |
| 7 | 5 | 3 | 6 | 6 | 6 | 4 | 3 | 5 | 5 | 12648.4433 | -0.0001 |
| 7 | 5 | 3 | 7 | 8 | 6 | 4 | 3 | 6 | 7 | 12648.4433 | 0.0007  |
| 7 | 5 | 3 | 7 | 7 | 6 | 4 | 3 | 5 | 6 | 12648.4998 | 0.0022  |
| 7 | 5 | 3 | 8 | 7 | 6 | 4 | 3 | 6 | 6 | 12648.4433 | 0.0026  |
| 7 | 5 | 3 | 7 | 6 | 6 | 4 | 3 | 6 | 5 | 12648.4564 | 0.0023  |
| 7 | 5 | 3 | 6 | 7 | 6 | 4 | 3 | 7 | 6 | 12648.4998 | 0.0021  |
| 7 | 5 | 3 | 8 | 9 | 6 | 4 | 3 | 7 | 8 | 12648.5395 | 0.0011  |
| 7 | 5 | 3 | 6 | 5 | 6 | 4 | 3 | 5 | 4 | 12648.5691 | -0.0032 |
| 7 | 5 | 3 | 8 | 7 | 6 | 4 | 3 | 7 | 6 | 12648.5841 | 0.0012  |
| 7 | 5 | 3 | 6 | 7 | 6 | 4 | 3 | 5 | 6 | 12648.6006 | 0.0036  |
| 7 | 6 | 1 | 7 | 7 | 6 | 5 | 1 | 6 | 6 | 13126.6743 | 0.0011  |
| 7 | 6 | 1 | 7 | 6 | 6 | 5 | 1 | 6 | 5 | 13126.7391 | 0.0008  |
| 7 | 6 | 1 | 7 | 8 | 6 | 5 | 1 | 6 | 7 | 13126.7391 | -0.0015 |
| 7 | 6 | 1 | 8 | 8 | 6 | 5 | 1 | 7 | 7 | 13126.8446 | -0.0013 |
| 7 | 6 | 1 | 6 | 6 | 6 | 5 | 1 | 5 | 5 | 13126.8671 | 0.0004  |
| 7 | 6 | 1 | 8 | 7 | 6 | 5 | 1 | 7 | 6 | 13126.9055 | -0.0047 |
| 7 | 6 | 1 | 8 | 9 | 6 | 5 | 1 | 7 | 8 | 13126.9170 | 0.0008  |
| 7 | 6 | 1 | 6 | 5 | 6 | 5 | 1 | 5 | 4 | 13126.9364 | 0.0019  |
| 7 | 6 | 1 | 6 | 7 | 6 | 5 | 1 | 5 | 6 | 13126.9364 | -0.0012 |
| 7 | 6 | 2 | 7 | 7 | 6 | 5 | 2 | 6 | 6 | 13139.1358 | -0.0008 |
| 7 | 6 | 2 | 7 | 6 | 6 | 5 | 2 | 6 | 5 | 13139.2127 | 0.0011  |
| 7 | 6 | 2 | 7 | 8 | 6 | 5 | 2 | 6 | 7 | 13139.2127 | -0.0005 |
| 7 | 6 | 2 | 8 | 8 | 6 | 5 | 2 | 7 | 7 | 13139.2712 | -0.0008 |
| 7 | 6 | 2 | 6 | 6 | 6 | 5 | 2 | 5 | 5 | 13139.2900 | 0.0036  |
| 7 | 6 | 2 | 8 | 7 | 6 | 5 | 2 | 7 | 6 | 13139.3457 | -0.0003 |
| 7 | 6 | 2 | 8 | 9 | 6 | 5 | 2 | 7 | 8 | 13139.3457 | -0.0040 |

|   |   |   |   |    |   |   |   |   |   |            |         |
|---|---|---|---|----|---|---|---|---|---|------------|---------|
| 7 | 6 | 2 | 6 | 5  | 6 | 5 | 2 | 5 | 4 | 13139.3663 | 0.0038  |
| 7 | 6 | 2 | 6 | 7  | 6 | 5 | 2 | 5 | 6 | 13139.3663 | 0.0012  |
| 8 | 4 | 4 | 9 | 9  | 7 | 3 | 4 | 8 | 8 | 13532.4104 | -0.0004 |
| 8 | 4 | 4 | 7 | 7  | 7 | 3 | 4 | 6 | 6 | 13532.4104 | -0.0084 |
| 8 | 4 | 4 | 9 | 10 | 7 | 3 | 4 | 8 | 9 | 13532.5197 | 0.0011  |
| 8 | 4 | 4 | 7 | 8  | 7 | 3 | 4 | 6 | 7 | 13532.5320 | 0.0069  |
| 8 | 4 | 4 | 9 | 8  | 7 | 3 | 4 | 8 | 7 | 13532.5320 | 0.0036  |
| 8 | 4 | 4 | 7 | 6  | 7 | 3 | 4 | 6 | 5 | 13532.5320 | -0.0055 |
| 8 | 4 | 4 | 8 | 8  | 7 | 3 | 4 | 7 | 7 | 13532.5517 | -0.0035 |
| 8 | 4 | 4 | 8 | 9  | 7 | 3 | 4 | 7 | 8 | 13532.6629 | 0.0027  |
| 8 | 4 | 4 | 8 | 7  | 7 | 3 | 4 | 7 | 6 | 13532.6757 | 0.0044  |
| 7 | 7 | 0 | 7 | 7  | 6 | 6 | 0 | 6 | 6 | 13676.7600 | 0.0009  |
| 7 | 7 | 0 | 7 | 6  | 6 | 6 | 0 | 6 | 5 | 13676.8217 | 0.0058  |
| 7 | 7 | 0 | 7 | 8  | 6 | 6 | 0 | 6 | 7 | 13676.8217 | 0.0004  |
| 7 | 7 | 0 | 6 | 6  | 6 | 6 | 0 | 5 | 5 | 13676.7776 | 0.0008  |
| 7 | 7 | 0 | 8 | 8  | 6 | 6 | 0 | 7 | 7 | 13676.8010 | -0.0029 |
| 7 | 7 | 0 | 6 | 5  | 6 | 6 | 0 | 5 | 4 | 13676.8217 | -0.0065 |
| 7 | 7 | 0 | 8 | 7  | 6 | 6 | 0 | 7 | 6 | 13676.8417 | -0.0077 |
| 7 | 7 | 0 | 6 | 7  | 6 | 6 | 0 | 5 | 6 | 13676.8417 | -0.0033 |
| 7 | 7 | 0 | 8 | 9  | 6 | 6 | 0 | 7 | 8 | 13676.8607 | -0.0002 |
| 7 | 7 | 1 | 7 | 7  | 6 | 6 | 1 | 6 | 6 | 13677.0482 | -0.0010 |
| 7 | 7 | 1 | 7 | 6  | 6 | 6 | 1 | 6 | 5 | 13677.1077 | 0.0020  |
| 7 | 7 | 1 | 7 | 8  | 6 | 6 | 1 | 6 | 7 | 13677.1147 | 0.0035  |
| 7 | 7 | 1 | 6 | 6  | 6 | 6 | 1 | 5 | 5 | 13677.0713 | 0.0050  |
| 7 | 7 | 1 | 8 | 8  | 6 | 6 | 1 | 7 | 7 | 13677.0938 | 0.0002  |
| 7 | 7 | 1 | 6 | 5  | 6 | 6 | 1 | 5 | 4 | 13677.1147 | -0.0026 |
| 7 | 7 | 1 | 8 | 7  | 6 | 6 | 1 | 7 | 6 | 13677.1415 | 0.0028  |
| 7 | 7 | 1 | 6 | 7  | 6 | 6 | 1 | 5 | 6 | 13677.1415 | 0.0073  |
| 7 | 7 | 1 | 8 | 9  | 6 | 6 | 1 | 7 | 8 | 13677.1499 | -0.0002 |
| 7 | 0 | 7 | 7 | 8  | 6 | 1 | 6 | 6 | 7 | 8920.3790  | 0.0024  |
| 7 | 0 | 7 | 6 | 7  | 6 | 1 | 6 | 5 | 6 | 8920.4366  | 0.0009  |
| 7 | 0 | 7 | 8 | 9  | 6 | 1 | 6 | 7 | 8 | 8920.4366  | -0.0009 |
| 7 | 0 | 7 | 8 | 7  | 6 | 1 | 6 | 7 | 6 | 8920.4681  | 0.0012  |
| 7 | 0 | 7 | 8 | 8  | 6 | 1 | 6 | 7 | 7 | 8920.4922  | 0.0002  |
| 7 | 1 | 7 | 7 | 8  | 6 | 0 | 6 | 6 | 7 | 8920.9936  | -0.0003 |
| 7 | 1 | 7 | 6 | 7  | 6 | 0 | 6 | 5 | 6 | 8921.0527  | -0.0026 |
| 7 | 1 | 7 | 8 | 9  | 6 | 0 | 6 | 7 | 8 | 8921.0527  | -0.0046 |
| 7 | 1 | 7 | 8 | 7  | 6 | 0 | 6 | 7 | 6 | 8921.0876  | 0.0013  |
| 7 | 1 | 7 | 8 | 8  | 6 | 0 | 6 | 7 | 7 | 8921.1121  | 0.0001  |
| 6 | 0 | 6 | 6 | 7  | 5 | 1 | 5 | 5 | 6 | 7682.9729  | 0.0001  |
| 6 | 0 | 6 | 6 | 5  | 5 | 1 | 5 | 5 | 4 | 7683.0015  | 0.0037  |
| 6 | 0 | 6 | 6 | 6  | 5 | 1 | 5 | 5 | 5 | 7683.0215  | 0.0000  |
| 6 | 0 | 6 | 5 | 6  | 5 | 1 | 5 | 4 | 5 | 7683.0449  | -0.0036 |
| 6 | 0 | 6 | 7 | 8  | 5 | 1 | 5 | 6 | 7 | 7683.0449  | -0.0048 |
| 6 | 0 | 6 | 7 | 6  | 5 | 1 | 5 | 6 | 5 | 7683.0886  | 0.0019  |
| 6 | 1 | 6 | 6 | 7  | 5 | 0 | 5 | 5 | 6 | 7685.6310  | -0.0030 |
| 6 | 1 | 6 | 6 | 6  | 5 | 0 | 5 | 5 | 5 | 7685.6913  | 0.0026  |
| 6 | 1 | 6 | 5 | 6  | 5 | 0 | 5 | 4 | 5 | 7685.7208  | 0.0001  |
| 6 | 1 | 6 | 7 | 8  | 5 | 0 | 5 | 6 | 7 | 7685.7208  | -0.0016 |
| 6 | 1 | 6 | 7 | 6  | 5 | 0 | 5 | 6 | 5 | 7685.7539  | -0.0034 |
| 6 | 1 | 6 | 7 | 7  | 5 | 0 | 5 | 6 | 6 | 7685.7946  | 0.0001  |

**Table S7:** Experimental frequencies of  $C_5F_5N\cdot^{15}NH_3$ . Assignments, measured transition frequencies ( $\nu$ /MHz), and observed-calculated residuals ( $\Delta\nu$ /MHz) from the fit.

| $J'$ | $K_a'$ | $K_c'$ | $F'$ | $J''$ | $K_a''$ | $K_c''$ | $F''$ | $\nu$ /MHz | $\Delta\nu$ /MHz |
|------|--------|--------|------|-------|---------|---------|-------|------------|------------------|
| 4    | 2      | 2      | 5    | 3     | 1       | 2       | 4     | 6703.2074  | 0.0028           |
| 4    | 2      | 2      | 3    | 3     | 1       | 2       | 2     | 6703.2472  | 0.0097           |
| 4    | 2      | 2      | 4    | 3     | 1       | 2       | 3     | 6703.4788  | 0.0023           |
| 4    | 1      | 3      | 3    | 3     | 0       | 3       | 2     | 6825.0816  | 0.0028           |
| 4    | 1      | 3      | 5    | 3     | 0       | 3       | 4     | 6825.4000  | 0.0036           |
| 4    | 1      | 3      | 4    | 3     | 0       | 3       | 3     | 6826.4903  | 0.0033           |
| 4    | 2      | 3      | 3    | 3     | 1       | 3       | 2     | 6974.9189  | 0.0017           |
| 4    | 2      | 3      | 5    | 3     | 1       | 3       | 4     | 6975.1450  | -0.0049          |
| 4    | 2      | 3      | 4    | 3     | 1       | 3       | 3     | 6975.8452  | 0.0018           |
| 4    | 3      | 1      | 4    | 3     | 2       | 1       | 3     | 6993.8045  | 0.0026           |
| 4    | 3      | 1      | 5    | 3     | 2       | 1       | 4     | 6994.2695  | 0.0031           |
| 4    | 3      | 1      | 3    | 3     | 2       | 1       | 2     | 6994.4869  | 0.0033           |
| 4    | 3      | 2      | 3    | 3     | 2       | 2       | 2     | 7169.9427  | 0.0009           |
| 4    | 3      | 2      | 5    | 3     | 2       | 2       | 4     | 7169.9634  | 0.0035           |
| 4    | 3      | 2      | 4    | 3     | 2       | 2       | 3     | 7170.0331  | 0.0033           |
| 4    | 4      | 0      | 4    | 3     | 3       | 0       | 3     | 7571.5892  | 0.0032           |
| 4    | 4      | 0      | 5    | 3     | 3       | 0       | 4     | 7571.8211  | 0.0011           |
| 4    | 4      | 0      | 3    | 3     | 3       | 0       | 2     | 7571.8407  | 0.0080           |
| 4    | 4      | 1      | 4    | 3     | 3       | 1       | 3     | 7590.1890  | 0.0053           |
| 4    | 4      | 1      | 3    | 3     | 3       | 1       | 2     | 7590.2654  | 0.0045           |
| 4    | 4      | 1      | 5    | 3     | 3       | 1       | 4     | 7590.2974  | 0.0029           |
| 5    | 1      | 4      | 4    | 4     | 0       | 4       | 3     | 8614.8845  | -0.0021          |
| 5    | 1      | 4      | 6    | 4     | 0       | 4       | 5     | 8615.1015  | -0.0019          |
| 5    | 1      | 4      | 5    | 4     | 0       | 4       | 4     | 8615.9918  | -0.0079          |
| 5    | 2      | 4      | 4    | 4     | 1       | 4       | 3     | 8675.3569  | -0.0056          |
| 5    | 2      | 4      | 6    | 4     | 1       | 4       | 5     | 8675.5498  | 0.0051           |
| 5    | 2      | 4      | 5    | 4     | 1       | 4       | 4     | 8676.2594  | 0.0003           |
| 5    | 2      | 3      | 4    | 4     | 1       | 3       | 3     | 8402.2548  | 0.0001           |
| 5    | 2      | 3      | 6    | 4     | 1       | 3       | 5     | 8402.3431  | 0.0026           |
| 5    | 2      | 3      | 5    | 4     | 1       | 3       | 4     | 8402.9454  | 0.0019           |
| 5    | 3      | 3      | 4    | 4     | 2       | 3       | 3     | 8755.0312  | 0.0005           |
| 5    | 3      | 3      | 6    | 4     | 2       | 3       | 5     | 8755.0724  | -0.0025          |
| 5    | 3      | 3      | 5    | 4     | 2       | 3       | 4     | 8755.3188  | -0.0017          |
| 5    | 3      | 2      | 5    | 4     | 2       | 2       | 4     | 8456.2193  | 0.0032           |
| 5    | 3      | 2      | 6    | 4     | 2       | 2       | 5     | 8456.3631  | 0.0007           |
| 5    | 3      | 2      | 4    | 4     | 2       | 2       | 3     | 8456.4718  | 0.0058           |
| 5    | 4      | 1      | 5    | 4     | 3       | 1       | 4     | 8966.7885  | 0.0000           |
| 5    | 4      | 1      | 6    | 4     | 3       | 1       | 5     | 8967.2282  | 0.0011           |
| 5    | 4      | 1      | 4    | 4     | 3       | 1       | 3     | 8967.3472  | -0.0005          |
| 5    | 4      | 2      | 5    | 4     | 3       | 2       | 4     | 9064.8709  | -0.0026          |
| 5    | 4      | 2      | 6    | 4     | 3       | 2       | 5     | 9064.9765  | -0.0003          |
| 5    | 4      | 2      | 4    | 4     | 3       | 2       | 3     | 9064.9984  | -0.0031          |
| 5    | 5      | 0      | 5    | 4     | 4       | 0       | 4     | 9539.4059  | 0.0019           |
| 5    | 5      | 0      | 4    | 4     | 4       | 0       | 3     | 9539.5135  | -0.0064          |
| 5    | 5      | 0      | 6    | 4     | 4       | 0       | 5     | 9539.5348  | 0.0014           |
| 5    | 5      | 1      | 5    | 4     | 4       | 1       | 4     | 9544.3955  | 0.0005           |
| 5    | 5      | 1      | 4    | 4     | 4       | 1       | 3     | 9544.4767  | 0.0015           |
| 5    | 5      | 1      | 6    | 4     | 4       | 1       | 5     | 9544.4960  | -0.0001          |
| 6    | 3      | 3      | 7    | 5     | 2       | 3       | 6     | 10032.9514 | -0.0022          |
| 6    | 3      | 3      | 5    | 5     | 2       | 3       | 4     | 10032.9687 | 0.0000           |
| 6    | 3      | 3      | 6    | 5     | 2       | 3       | 5     | 10033.1311 | -0.0009          |
| 6    | 4      | 2      | 6    | 5     | 3       | 2       | 5     | 10343.5262 | -0.0007          |
| 6    | 4      | 2      | 7    | 5     | 3       | 2       | 6     | 10343.9104 | -0.0032          |
| 6    | 4      | 2      | 5    | 5     | 3       | 2       | 4     | 10344.0237 | 0.0018           |
| 6    | 3      | 4      | 5    | 5     | 2       | 4       | 4     | 10402.7609 | 0.0007           |
| 6    | 3      | 4      | 7    | 5     | 2       | 4       | 6     | 10402.8119 | -0.0099          |
| 6    | 3      | 4      | 6    | 5     | 2       | 4       | 5     | 10403.1938 | 0.0002           |
| 6    | 4      | 3      | 7    | 5     | 3       | 3       | 6     | 10586.6537 | -0.0054          |
| 6    | 4      | 3      | 6    | 5     | 3       | 3       | 5     | 10586.6716 | -0.0030          |
| 6    | 5      | 1      | 6    | 5     | 4       | 1       | 5     | 10957.9424 | -0.0025          |
| 6    | 5      | 1      | 7    | 5     | 4       | 1       | 6     | 10958.2189 | -0.0059          |
| 6    | 5      | 1      | 5    | 5     | 4       | 1       | 4     | 10958.2764 | -0.0008          |
| 6    | 5      | 2      | 6    | 5     | 4       | 2       | 5     | 10995.3902 | -0.0013          |
| 6    | 5      | 2      | 7    | 5     | 4       | 2       | 6     | 10995.5374 | -0.0022          |
| 6    | 5      | 2      | 5    | 5     | 4       | 2       | 4     | 10995.5606 | -0.0028          |
| 6    | 6      | 0      | 6    | 5     | 5       | 0       | 5     | 11502.0628 | 0.0018           |
| 6    | 6      | 0      | 5    | 5     | 5       | 0       | 4     | 11502.1288 | -0.0015          |
| 6    | 6      | 0      | 7    | 5     | 5       | 0       | 6     | 11502.1468 | 0.0004           |
| 6    | 6      | 1      | 6    | 5     | 5       | 1       | 5     | 11503.2443 | -0.0011          |
| 6    | 6      | 1      | 5    | 5     | 5       | 1       | 4     | 11503.3113 | 0.0034           |
| 6    | 6      | 1      | 7    | 5     | 5       | 1       | 6     | 11503.3233 | -0.0017          |

**Table S8:** Experimental substitution ( $r_s$ ) and theoretical equilibrium ( $r_e$ , B3LYP-GD3(BJ)/def2-TZVP) coordinates in the principal axis coordinates of ammonia N atom (Å).

| $C_6F_6 \cdot NH_3$ | <i>a</i>           | <i>b</i>                      | <i>c</i>        |
|---------------------|--------------------|-------------------------------|-----------------|
| $r_s$               | [0] <sup>[a]</sup> | $\pm 0.803(2)$ <sup>[b]</sup> | $\pm 2.7738(6)$ |
| $r_e$               | [0]                | 0.729                         | -2.759          |
| $C_6F_6 \cdot NH_3$ |                    |                               |                 |
| $r_s$               | [0]                | [0]                           | $\pm 2.9716(5)$ |
| $r_e$               | [0]                | [0]                           | 2.931           |

<sup>[a]</sup> Zero by symmetry. <sup>[b]</sup> Error in parentheses in units of the last digit.

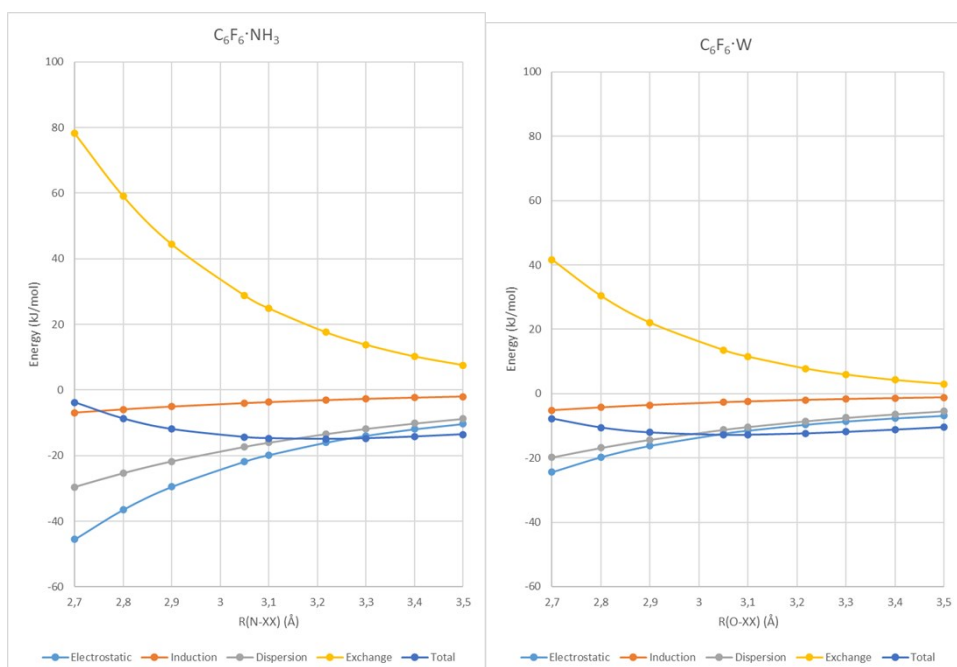

**Figure S1.** SAPT2+3(CCD)/aug-cc-pVDZ analysis for the complexes of water and ammonia formed with  $C_6F_6$  as a function of the distance of N or O from the center of the ring.
